# Supplementary material for: Integrated Scheme of Traditional Chinese Medicine for Delaying the Morbidity of HIV Infection: Study Protocol for a Multicentre, Randomised Controlled Trial
Source: Research Square preprint supplement (doi:10.21203/rs.3.rs-652624/v1), 2021-06-30
Supplement: Supplementary file 1 [file 58cb666a288e106573b16473.docx]

| Table 2 Data collected from follow-up date for CAP | | | | | | | | |
| --- | --- | --- | --- | --- | --- | --- | --- | --- |
| **Observation indices Inclusion Observation period** | | | | | | | | |
| Time window | D-1 | D1 | D3 | D5 | | D7 | D10 | D14 |
| Basic information | | | | | | | | |
| Informed consent | √ |  |  | |  |  |  |  |
| Basic information | √ |  |  | |  |  |  |  |
| Interventions | | | | | | | | |
| 1. Antibiotic 2. QFPY 3. WFPY | √ | √ | √ | | √ | √ | √ | √ |
| 1. Antibiotic  2. QFPY Placebo  3. WFPY Placebo | √ | √ | √ | | √ | √ | √ | √ |
| Outcome measure | | | | | | | | |
| Clinical symptoms score | √ | √ | √ | | √ | √ | √ | √ |
| TCM syndrome score | √ | √ | √ | | √ | √ | √ | √ |
| CRP | √ |  |  | |  |  |  | √ |
| PCT | √ |  |  | |  |  |  |  |
| Sputum culture |  |  |  | |  |  |  |  |
| Chest CT |  |  |  | |  |  |  |  |
| Safety assessments | | | | | | | | |
| Blood, urine, stoolroutine √ | |  |  | |  |  | √ |  |
| Liver and kidney function √ | |  |  | |  |  | √ |  |
| Electrocardiogram | √ |  |  | |  |  | √ |  |
| Chest X-ray | √ |  |  | |  |  | √ |  |
| Adverse event | √ | √ | √ | | √ | √ | √ | √ |
| TCM, traditional Chinese medicine; QFPY, Qing Fei Pei Yuan capsule; WFPY, Wen Fei Pei Yuan  Capsule; CRP, C-reactive Protein; PCT, procalcitonin. | | | | | | | | |
